# Supplementary material for: In situconfined vertical growth of a 1D-CuCo2S4nanoarray on Ni foam covered by a 3D-PANI mesh layer to form a self-supporting hierarchical structure for high-efficiency oxygen evolution catalysis
Source: Royal Society of Chemistry journal article supplement (doi:10.1039/c9nr02815c), 2019-01-01
Supplement: c9nr02815c1.pdf [file c9nr02815c1.pdf]

## In situ confined vertical growth of a 1D-CuCo<sub>2</sub>S<sub>4</sub> nanoarray on Ni foam covered by a 3D-PANI mesh layer to form a self-supporting hierarchical structure for high-efficiency oxygen evolution catalysis

Wei Sun<sup>a</sup>, Wei Wei<sup>a,b\*</sup>, Nan Chen<sup>a</sup>, Linlin Chen<sup>a</sup>, Yin Xu<sup>a</sup>, Chidinma Judith Oluigbo<sup>a</sup>, Zhifeng Jiang<sup>a,b</sup>, Zaoxue Yan<sup>a</sup> and Jimin Xie<sup>a</sup>

<sup>a</sup> School of Chemistry & Chemical Engineering, Center of Analysis and Test, Jiangsu University, Zhenjiang, PR China

<sup>b</sup> School of Life Sciences, The Chinese University of Hong Kong, Hong Kong, PR China

\*weiwei@ujs.edu.cn

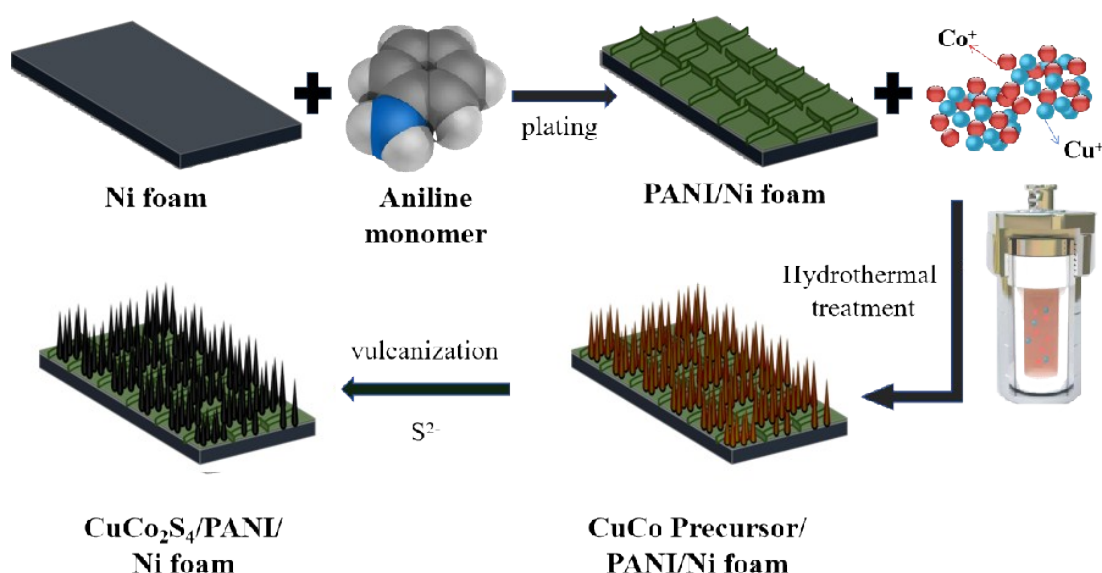

**Figure S1.** The synthesis mechanism of self-supporting CuCo<sub>2</sub>S<sub>4</sub>/PANI/NF

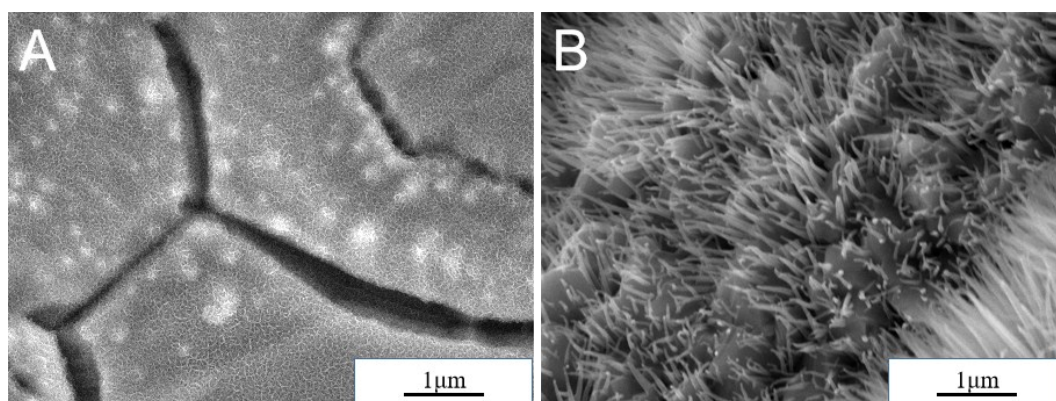

**Figure S2.** SEM images of PANI/NF(A) and CuCo<sub>2</sub>S<sub>4</sub>/PANI/NF(B)

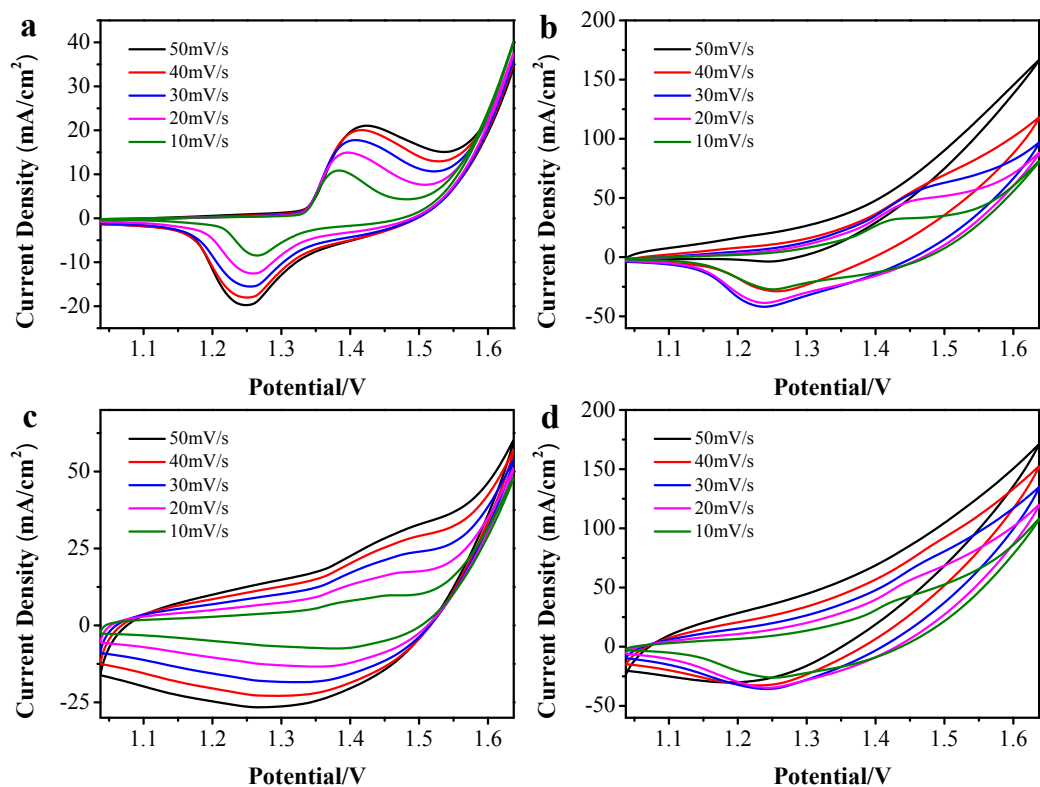

**Figure S3.** CV curves at different scan rates: PANI/NF(a), CuCo<sub>2</sub>S<sub>4</sub>/NF(b), CuCo<sub>2</sub>O<sub>4</sub>/PANI/CF(c), CuCo<sub>2</sub>S<sub>4</sub>/PANI/CF(d)

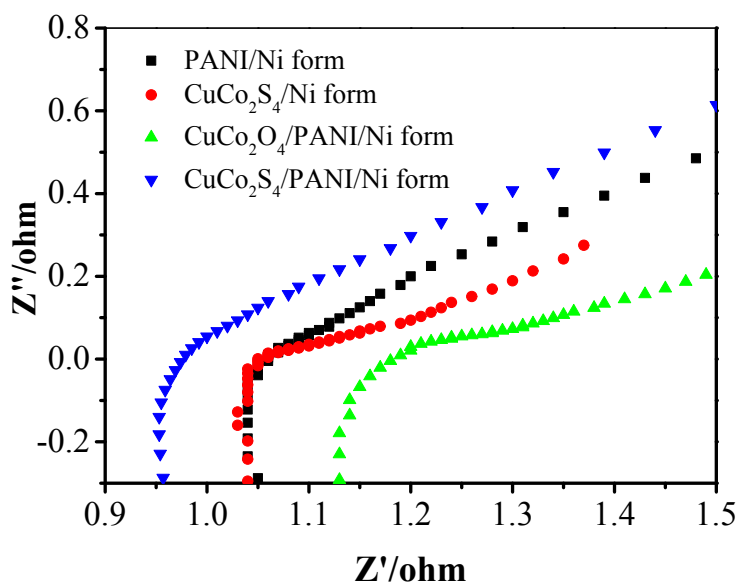

**Figure S4.** Nyquist plots of as-prepared samples
